# Supplementary material for: External Validation of Equations to Estimate Resting Energy Expenditure in Critically Ill Children and Adolescents with and without Malnutrition: A Cross-Sectional Study
Source: MDPI journal article supplement (doi:10.3390/nu14194149), 2022-10-06
Supplement: s1 [file s1]

**Table S1.** Predicted energy expenditure equations compared to indirect calorimetry for calculating energy expenditure in critically ill children.

| Reference                                                                                      | Clinical condition<br>Age range (years) | Predictive equation (kcal/day)                                                                          |
|------------------------------------------------------------------------------------------------|-----------------------------------------|---------------------------------------------------------------------------------------------------------|
| <b>Harris-Benedict [1]</b>                                                                     | Healthy; 21-70                          |                                                                                                         |
| • Male                                                                                         |                                         | $66.473 + (13.7516 \times \text{Weight}) + (5.0033 \times \text{Height}) - (6.755 \times \text{Age})$   |
| • Female                                                                                       |                                         | $655.0955 + (9.5634 \times \text{Weight}) + (1.8496 \times \text{Height}) - (4.6756 \times \text{Age})$ |
| <b>Schofield H-W (WHO) [2]</b>                                                                 | Healthy; 3-18                           |                                                                                                         |
| <3 years old                                                                                   |                                         |                                                                                                         |
| • Male                                                                                         |                                         | $(0.167 \times \text{Weight}) + (1517.4 \times \text{Height}) - 617.6$                                  |
| • Female                                                                                       |                                         | $(16.252 \times \text{Weight}) + (1023.2 \times \text{Height}) - 413.5$                                 |
| 3-10 years old                                                                                 |                                         |                                                                                                         |
| • Male                                                                                         |                                         | $(19.6 \times \text{Weight}) + (103.3 \times \text{Height}) + 414.9$                                    |
| • Female                                                                                       |                                         | $(16.97 \times \text{Weight}) + (161.8 \times \text{Height}) + 371.2$                                   |
| 10-18 years old                                                                                |                                         |                                                                                                         |
| • Male                                                                                         |                                         | $(16.25 \times \text{Weight}) + (137.2 \times \text{Height}) + 515.5$                                   |
| • Female                                                                                       |                                         | $(8.365 \times \text{Weight}) + (465 \times \text{Height}) + 200$                                       |
| <b>FAO/WHO/UNU [3]</b>                                                                         | Healthy; 3-18                           |                                                                                                         |
| <3 years old                                                                                   |                                         |                                                                                                         |
| • Male                                                                                         |                                         | $(60.9 \times \text{Weight}) - 54$                                                                      |
| • Female                                                                                       |                                         | $(61 \times \text{Weight}) - 51$                                                                        |
| 3-10 years old                                                                                 |                                         |                                                                                                         |
| • Male                                                                                         |                                         | $(22.7 \times \text{Weight}) + 495$                                                                     |
| • Female                                                                                       |                                         | $(22.5 \times \text{Weight}) + 499$                                                                     |
| 10-18 years old                                                                                |                                         |                                                                                                         |
| • Male                                                                                         |                                         | $(16.6 \times \text{Weight}) + (77 \times \text{Height}) + 572$                                         |
| • Female                                                                                       |                                         | $(7.4 \times \text{Weight}) + (482 \times \text{Height}) + 217$                                         |
| <b>Henry (Oxford) W-H [4]</b>                                                                  | Healthy; 3-18                           |                                                                                                         |
| <3 years old                                                                                   |                                         |                                                                                                         |
| • Male                                                                                         |                                         | $(28.2 \times \text{Weight}) + (859 \times \text{Height}^*) - 371$                                      |
| • Female                                                                                       |                                         | $(30.4 \times \text{Weight}) + (703 \times \text{Height}^*) - 287$                                      |
| 3-10 years old                                                                                 |                                         |                                                                                                         |
| • Male                                                                                         |                                         | $(15.1 \times \text{Weight}) + (74.2 \times \text{Height}^*) + 306$                                     |
| • Female                                                                                       |                                         | $(15.9 \times \text{Weight}) + (210 \times \text{Height}^*) + 349$                                      |
| 10-18 years old                                                                                |                                         |                                                                                                         |
| • Male                                                                                         |                                         | $(15.6 \times \text{Weight}) + (266 \times \text{Height}^*) + 299$                                      |
| • Female                                                                                       |                                         | $(9.40 \times \text{Weight}) + (249 \times \text{Height}^*) + 462$                                      |
| <b>Institute for Medicine of the National Academies and Food and Nutrition Board (IOM) [5]</b> | Healthy; 0-18                           |                                                                                                         |
| • Male                                                                                         |                                         | $68 - (43.3 \times \text{Age}) + (712 \times \text{Height}) + (19.2 \times \text{Weight})$              |
| • Female                                                                                       |                                         | $189 - (17.6 \times \text{Age}) + (625 \times \text{Height}) + (7.9 \times \text{Weight})$              |
| <b>Lawrence (Equation 3) [6]</b>                                                               | Healthy; 4-11                           |                                                                                                         |

|                                 |                                                                                |                                                                                                                                                            |
|---------------------------------|--------------------------------------------------------------------------------|------------------------------------------------------------------------------------------------------------------------------------------------------------|
|                                 |                                                                                | $632.4 + (15.66 \times \text{Age}) + (9.53 \times \text{Weight})$                                                                                          |
| <b>Kaneko [7]</b>               | Healthy; 6-17                                                                  |                                                                                                                                                            |
| • Male                          |                                                                                | $(14.4 \times \text{Weight}) + (5.09 \times \text{Height}) - (34 \times \text{Age}) + 403$                                                                 |
| • Female                        |                                                                                | $(7.64 \times \text{Weight}) + (4.22 \times \text{Height}) - (22.5 \times \text{Age}) + 526$                                                               |
| <b>Dietz [8]</b>                | Healthy; 6-17                                                                  |                                                                                                                                                            |
| • Male                          |                                                                                | $(16.6 \times \text{Weight}) + (77 \times \text{Height}^*) + 572$                                                                                          |
| • Female                        |                                                                                | $(7.4 \times \text{Weight}) + (482 \times \text{Height}^*) + 217$                                                                                          |
| <b>Maffei [9]</b>               | Healthy; obese; 6-10                                                           |                                                                                                                                                            |
| • Male                          |                                                                                | $1.287 + (28.6 \times \text{Weight}) + (23.6 \times \text{Height}) - (69.1 \times \text{Age})^{\#}$                                                        |
| • Female                        |                                                                                | $1.552 + (35.8 \times \text{Weight}) + (15.6 \times \text{Height}) - (36.3 \times \text{Age})^{\#}$                                                        |
| <b>Molnár [10]</b>              | Healthy; obese; 10-16                                                          |                                                                                                                                                            |
| • Male                          |                                                                                | $(50 \times \text{Weight}) + (25.3 \times \text{Height}) - (50.3 \times \text{Age}) + 26.9^{\#}$                                                           |
| • Female                        |                                                                                | $(51.2 \times \text{Weight}) + (24.5 \times \text{Height}) - (207.5 \times \text{Age}) + 1.629.8^{\#}$                                                     |
| <b>Muller [11]</b>              | Healthy; obese; 5-17                                                           |                                                                                                                                                            |
| • Male                          |                                                                                | $(50 \times \text{Weight}) + (25.3 \times \text{Height}) - (50.3 \times \text{Age}) + 26.9^{\#}$                                                           |
| • Female                        |                                                                                | $(51.2 \times \text{Weight}) + (24.5 \times \text{Height}) - (207.5 \times \text{Age}) + 1.629.8^{\#}$                                                     |
| <b>Mifflin [12]</b>             | Healthy; obese; 19-78                                                          |                                                                                                                                                            |
|                                 |                                                                                | $(9.99 \times \text{Weight}) + (6.25 \times \text{Height}) - (4.92 \times \text{Age}) + (166 \times \text{sex} (1 \text{ male; } 0 \text{ female})) - 161$ |
| <b>Lazzer (Equation 1) [13]</b> | Obese; 7-18                                                                    |                                                                                                                                                            |
|                                 |                                                                                | $(12 \times \text{Weight}) - (14 \times \text{Age}) + (241 \times \text{Sex} (1 \text{ male; } 0 \text{ female})) + 909$                                   |
| <b>Caldwell-Kennedy [14]</b>    | Healthy; obese; Studied in critically ill, mechanically ventilated [15]; 19-78 |                                                                                                                                                            |
|                                 |                                                                                | $22 + (31.05 \times \text{Weight}) + (1.16 \times \text{Age})$                                                                                             |
| <b>White (Equation 2) [16]</b>  | Critically ill, mechanically ventilated; 54±53 months                          |                                                                                                                                                            |
|                                 |                                                                                | $(17 \times \text{Age}) - (48 \times \text{Weight}) + (292 \times \text{Temperature (°C)}) - 9677^{\#}$                                                    |
| <b>Meyer (Equation C) [17]</b>  | Critically ill, mechanically ventilated; 3-16                                  |                                                                                                                                                            |
| • <3 years old                  |                                                                                | $(88 \times \text{Weight}) + 92 - (0.7 \times \text{Weight})^2 - (37 \times \text{Weight})$                                                                |
| • 3-10 years old                |                                                                                | $(88 \times \text{Weight}) + 110 - (0.7 \times \text{Weight})^2 - (37 \times \text{Weight})$                                                               |
| • 10-18 years old               |                                                                                | $(88 \times \text{Weight}) - 910 - (0.7 \times \text{Weight})^2$                                                                                           |

\*Height in meters; <sup>#</sup> Predicted energy expenditure in KJ/day

## References

1. Harris, J.A.; Benedict, F.G. A Biometric Study of Human Basal Metabolism. *Proc Natl Acad Sci U S A* **1918**, *4*, 370–373, doi:10.1073/pnas.4.12.370.
2. Schofield, W.N. Predicting Basal Metabolic Rate, New Standards and Review of Previous Work. *Hum Nutr Clin Nutr* **1985**, *39 Suppl 1*, 5–41.
3. Energy and Protein Requirements. Report of a Joint FAO/WHO/UNU Expert Consultation. *World Health Organ Tech Rep Ser* **1985**, *724*, 1–206.
4. Henry, C.J.K. Basal Metabolic Rate Studies in Humans: Measurement and Development of New Equations. *Public Health Nutr* **2005**, *8*, 1133–1152, doi:10.1079/phn2005801.
5. Trumbo, P.; Schlicker, S.; Yates, A.A.; Poos, M.; Food and Nutrition Board of the Institute of Medicine, The National Academies Dietary Reference Intakes for Energy, Carbohydrate, Fiber, Fat, Fatty Acids, Cholesterol, Protein and Amino Acids. *J Am Diet Assoc* **2002**, *102*, 1621–1630, doi:10.1016/s0002-8223(02)90346-9.
6. Lawrence, J.C.; Lee, H.-M.; Kim, J.-H.; Kim, E.-K. Variability in Results from Predicted Resting Energy Needs as Compared to Measured Resting Energy Expenditure in Korean Children. *Nutr Res* **2009**, *29*, 777–783, doi:10.1016/j.nutres.2009.10.017.
7. Kaneko, K.; Ito, C.; Koizumi, K.; Watanabe, S.; Umeda, Y.; Ishikawa-Takata, K. Resting Energy Expenditure (REE) in Six- to Seventeen-Year-Old Japanese Children and Adolescents. *J Nutr Sci Vitaminol (Tokyo)* **2013**, *59*, 299–309, doi:10.3177/jnsv.59.299.
8. Dietz, W.H.; Bandini, L.G.; Schoeller, D.A. Estimates of Metabolic Rate in Obese and Nonobese Adolescents. *J Pediatr* **1991**, *118*, 146–149, doi:10.1016/s0022-3476(05)81870-0.
9. Maffeis, C.; Schutz, Y.; Micciolo, R.; Zocante, L.; Pinelli, L. Resting Metabolic Rate in Six- to Ten-Year-Old Obese and Nonobese Children. *J Pediatr* **1993**, *122*, 556–562, doi:10.1016/s0022-3476(05)83535-8.
10. Molnár, D.; Jeges, S.; Erhardt, E.; Schutz, Y. Measured and Predicted Resting Metabolic Rate in Obese and Nonobese Adolescents. *J Pediatr* **1995**, *127*, 571–577, doi:10.1016/s0022-3476(95)70114-1.
11. Müller, M.J.; Bosy-Westphal, A.; Klaus, S.; Kreyman, G.; Lührmann, P.M.; Neuhäuser-Berthold, M.; Noack, R.; Pirke, K.M.; Platte, P.; Selberg, O.; et al. World Health Organization Equations Have Shortcomings for Predicting Resting Energy Expenditure in Persons from a Modern, Affluent Population: Generation of a New Reference Standard from a Retrospective Analysis of a German Database of Resting Energy Expenditure. *Am J Clin Nutr* **2004**, *80*, 1379–1390, doi:10.1093/ajcn/80.5.1379.
12. Mifflin, M.D.; St Jeor, S.T.; Hill, L.A.; Scott, B.J.; Daugherty, S.A.; Koh, Y.O. A New Predictive Equation for Resting Energy Expenditure in Healthy Individuals. *Am J Clin Nutr* **1990**, *51*, 241–247, doi:10.1093/ajcn/51.2.241.
13. Lazzer, S.; Patrizi, A.; De Col, A.; Saezza, A.; Sartorio, A. Prediction of Basal Metabolic Rate in Obese Children and Adolescents Considering Pubertal Stages and Anthropometric Characteristics or Body Composition. *Eur J Clin Nutr* **2014**, *68*, 695–699, doi:10.1038/ejcn.2014.26.
14. Caldwell, M.D.; Kennedy-Caldwell, C. Normal Nutritional Requirements. *Surg Clin North Am* **1981**, *61*, 489–507, doi:10.1016/s0039-6109(16)42432-1.
15. Vazquez Martinez, J.L.; Martinez-Romillo, P.D.; Diez Sebastian, J.; Ruza Tarrio, F. Predicted versus Measured Energy Expenditure by Continuous, Online Indirect Calorimetry in Ventilated, Critically Ill Children during the Early Postinjury Period. *Pediatr Crit Care Med* **2004**, *5*, 19–27, doi:10.1097/01.PCC.0000102224.98095.0A.
16. White, M.S.; Shepherd, R.W.; McEniery, J.A. Energy Expenditure in 100 Ventilated, Critically Ill Children: Improving the Accuracy of Predictive Equations. *Crit Care Med* **2000**, *28*, 2307–2312, doi:10.1097/00003246-200007000-00021.
17. Meyer, R.; Kulinskaya, E.; Briassoulis, G.; Taylor, R.M.; Cooper, M.; Pathan, N.; Habibi, P. The Challenge of Developing a New Predictive Formula to Estimate Energy Requirements in Ventilated Critically Ill Children. *Nutr Clin Pract* **2012**, *27*, 669–676, doi:10.1177/0884533612448479.
